# Supplementary material
Source: HighWire-hosted journal article supplement (doi:10.1101/rna.080990.126)
Supplement: Supplemental_Legends.docx [file Supplemental_Legends.docx]

# Supplementary Data

Supplementary Figure 1: Illustration of the MIRNAPEX workflow.

Supplementary Figure 2: RNA-seq coverage across the MIR7-3HG locus showing the position of miR-7-5p.

Supplementary Figure 3: RNA-seq coverage across the DLEU2 locus showing the position of miR-15a-5p.

Supplementary Figure 4: RNA-seq coverage across the MIR17HG locus showing the position of miR-92a-3p.

Supplementary Figure 5: RNA-seq coverage across the SLIT2 locus showing the position of miR-218-5p.

Supplementary Figure 6: RNA-seq coverage across the MIR29B2CHG locus showing the position of miR-29b-3p.

Supplementary Figure 7: Frequency with which inclusion of APA improves prediction across miRNAs stratified by expression-only model performance.

Supplementary Figure 8: Predictive performance of MirGeneDB-annotated miRNAs.

Supplementary Table 1: Benchmarking metrics for the pretrained miRNA models using a 1000-feature set with EN.
